# Supplementary material for: Using ML techniques to predict extubation outcomes for patients with central nervous system injuries in the Yun-Gui Plateau
Source: Research Square preprint supplement (doi:10.21203/rs.3.rs-5549340/v1), 2025-04-10
Supplement: Supplementary file 1 [file d2fff0ebeef76988590ea5f9.pdf]

## Supplementary Methods

### Diagnostic criteria

1. **Smoking history:** Smoking at least 1 cigarette every day for a consecutive year.

2. **Epilepsy:** Patients clinically present with seizures and exhibit seizure-like discharges on EEG recordings during or between seizures. Diagnosis of epilepsy is made if seizures are observed, or if there is a history of taking antiepileptic drugs in the past<sup>1</sup>.

3. **High blood pressure:** In the absence of antihypertensive medication, if the systolic blood pressure is  $\geq 140\text{mmHg}$  and/or diastolic blood pressure is  $\geq 90\text{mmHg}$  in three separate measurements on different days, the patient is diagnosed with hypertension. Even if the blood pressure is below 140/90mmHg and the patient has a history of hypertension and is currently taking antihypertensive medication, they should still be diagnosed with hypertension<sup>2</sup>.

4. **Diabetes:** According to the diagnostic criteria proposed by the World Health Organization Expert Committee on Diabetes in 1999: fasting blood glucose  $\geq 7.0\text{mmol/L}$  (confirm on another day if no typical diabetes symptoms are present); or typical diabetes symptoms with random blood glucose or venous plasma glucose  $\geq 11.1\text{mmol/L}$ ; or 2-hour blood glucose  $\geq 11.1\text{mmol/L}$  in an oral glucose tolerance test (confirm on another day if no typical diabetes symptoms are present); or glycosylated hemoglobin  $\geq 6.5\%$ <sup>3</sup>.

5. **Coronary artery disease:** Coronary angiography shows at least one coronary artery stenosis  $\geq 50\%$ , or a history of coronary artery bypass grafting<sup>4</sup>.

6. **Pulmonary embolism:** According to the "Diagnosis and Treatment Guidelines for Pulmonary Thromboembolism," a CT pulmonary angiography showing filling defects in the pulmonary artery is used to diagnose pulmonary embolism<sup>5</sup>.

7. **Pulmonary contusion:** With a clear history of chest trauma, the patient presents with symptoms such as chest pain, shortness of breath, hemoptysis, and even respiratory distress. Physical examination reveals crackles in the lungs and decreased breath sounds. Diagnosis of pulmonary contusion is confirmed through X-ray or CT imaging<sup>6</sup>.

8. **Pneumonia:** According to the "Guidelines for the Diagnosis and Treatment of Community-Acquired Pneumonia in Chinese Adults," chest radiography showing newly developed patchy infiltrates, lobar or segmental consolidation, ground-glass opacity, or interstitial

changes, along with any of the following features: (1) fever; (2) new onset cough, sputum production, or worsening of existing respiratory symptoms; (3) signs of lung consolidation and/or auscultation of crackles; (4) peripheral blood leukocytes  $>10 \times 10^9/L$  or  $<4 \times 10^9/L$  <sup>7</sup>

**9. Consciousness disorder:** The Glasgow Coma Scale was used in this study to assess the patients' level of consciousness. GCS consists of three aspects: eye opening response (1-4 points), verbal response (1-5 points), and motor response (1-6 points), with a total score of 15 points. A score of  $\leq 8$  points indicates severe consciousness disorder, 9-12 points indicates moderate consciousness disorder, 13-14 points indicates mild consciousness disorder, and 15 points indicates clear consciousness. A higher score indicates a milder consciousness disorder<sup>8</sup>.

**10. Swallowing disorder:** This study used the Wakita water swallowing test to evaluate patients' swallowing function. The Wakita water swallowing test is graded into 5 levels: Level I (Excellent): can swallow water in one attempt; Level II (Good): can swallow water without coughing at least 2 times; Level III (Fair): can swallow water in one attempt but coughs; Level IV (Acceptable): can swallow water at least 2 times but coughs; Level V (Poor): frequently coughs and cannot swallow all the water<sup>9</sup>.

## Categorical variable label encoding

During the correlation analysis, categorical variables were converted into dummy variables for use in machine learning. For binary classification variables, 1 represented "yes" and 0 represented "no". For multiclass variables, different categories were represented by Arabic numerals from 1 to the total number of categories.

| Variables              | Category | Dummy variables |
|------------------------|----------|-----------------|
| Meal gender            | yes      | 1               |
|                        | no       | 0               |
| Wet Rales              | yes      | 1               |
|                        | no       | 0               |
| Smoking                | yes      | 1               |
|                        | no       | 0               |
| Consciousness Disorder | yes      | 1               |
|                        | no       | 0               |
| Dysphagia              | yes      | 1               |
|                        | no       | 0               |
| Epilepsy               | yes      | 1               |
|                        | no       | 0               |

|                                                         |                                            |   |
|---------------------------------------------------------|--------------------------------------------|---|
| Viscous sputum                                          | yes                                        | 1 |
|                                                         | no                                         | 0 |
| Upper Respiratory Tract Structural Abnormalities (URSA) | yes                                        | 1 |
|                                                         | no                                         | 0 |
| Hypertension                                            | yes                                        | 1 |
|                                                         | no                                         | 0 |
| Coronary Heart Disease                                  | yes                                        | 1 |
|                                                         | no                                         | 0 |
| Diabetes Mellitus                                       | yes                                        | 1 |
|                                                         | no                                         | 0 |
| Pulmonary Infection                                     | yes                                        | 1 |
|                                                         | no                                         | 0 |
| Pulmonary Embolism                                      | yes                                        | 1 |
|                                                         | no                                         | 0 |
| Pulmonary Contusion                                     | yes                                        | 1 |
|                                                         | no                                         | 0 |
| Mental Disorders                                        | yes                                        | 1 |
|                                                         | no                                         | 0 |
| Disease Duration :                                      | $DD \leq 30$ days                          | 1 |
|                                                         | $30 \text{ days} < DD \leq 60$ days        | 2 |
|                                                         | $60 \text{ days} < DD \leq 90$ days        | 3 |
|                                                         | $DD > 90$ days                             | 4 |
| Primary Disease :                                       | Cerebral Trauma                            | 1 |
|                                                         | Cerebral Hemorrhage                        | 2 |
|                                                         | Cerebral Infarction                        | 3 |
|                                                         | Subarachnoid Hemorrhage                    | 4 |
|                                                         | Ischemic Hypoxic Brain Disease             | 5 |
|                                                         | Central Nervous System Infectious Diseases | 6 |
|                                                         | Spinal Cord Injury                         | 7 |
|                                                         | Other Diseases                             | 8 |
| Limb Paralysis :                                        | Quadriplegia                               | 1 |
|                                                         | Hemiplegia                                 | 2 |
|                                                         | Paraplegia                                 | 3 |
| Sputum Culture Pathogens :                              | Pseudomonas aeruginosa                     | 1 |
|                                                         | Klebsiella pneumoniae pneumoniae subtype   | 2 |

|  |                         |   |
|--|-------------------------|---|
|  | Acinetobacter baumannii | 3 |
|  | Escherichia coli        | 4 |
|  | Serratia marcescens     | 5 |
|  | Other Pathogens         | 6 |
|  | Two or more pathogens   | 7 |
|  | None                    | 8 |

**Table S1. Categorical variables and dummy variables.**

## Hyperparameter optimization and parameter tuning

In this study, a total of eight models were constructed, including K-Nearest Neighbors (K-NN), Support Vector Machine (SVM) <sup>10</sup>, Gaussian Naive Bayes (GNB), Decision Tree (DT), Random Forest (RF) <sup>11</sup>, Extra Trees Classifier (ET), Gradient Boosting (GB), and Logistic Regression (LR), to compare the predictive performance of each model. Modeling parameters were selected using cross-validation and hyperparameter optimization. The screened features collected in this study were used as feature variables, with extubation outcomes as the target variable. In the dataset of 501 patients, 80% of the data was used as the training set, while 20% was used as the test set. Accuracy was calculated using the relevant formulas <sup>10</sup>. The raw data processing was performed using the Numpy package in Python 2020, while dataset splitting and model construction were carried out using the Sklearn package<sup>12</sup>. The details of hyperparameter optimization were provided in Supplementary Material, Table S2.

| Feature                      | Range                              | Optimal value |
|------------------------------|------------------------------------|---------------|
| <b>KNN</b>                   |                                    |               |
| k_values                     | 1-40                               | 24            |
| <b>SVM</b>                   |                                    |               |
| Kernel                       | linear', 'poly', 'rbf', 'sigmoid'  | linear'       |
| max_iter                     | 10-1000                            | 500           |
| Regularization parameter (C) | 0.01-100                           | 0.1           |
| probability                  | Ture-False                         | Ture          |
| <b>Gaussian Naive Bayes</b>  |                                    |               |
| var_smoothing                | 10 <sup>-1</sup> -10 <sup>-9</sup> | 0.01          |
| <b>Decision Tree</b>         |                                    |               |
| max_depth                    | 3-20                               | 3             |
| min_samples_leaf             | 1-50                               | 3             |
| criterion                    | gini', 'entropy'                   | entropy'      |
| min_samples_split            | 2-50                               | 5             |
| splitter                     | best', 'random'                    | best'         |
| <b>Random Forest</b>         |                                    |               |

|                                       |                                                 |              |
|---------------------------------------|-------------------------------------------------|--------------|
| max_depth                             | 3-20                                            | 5            |
| max_features                          | sqrt', 'log2',                                  | sqrt'        |
| min_samples_leaf                      | 1-20                                            | 2            |
| n_estimators                          | 100-5000                                        | 700          |
| random_state                          | 1-20                                            | 3            |
| max_leaf_nodes                        | 10-100                                          | 30           |
| min_samples_split                     | 2-20                                            | 10           |
| <b>Extra Tree Classifier</b>          |                                                 |              |
| max_depth                             | 3-20                                            | 10           |
| max_features                          | sqrt', 'log2',                                  | sqrt'        |
| min_samples_leaf                      | 1-20                                            | 2            |
| n_estimators                          | 100-5000                                        | 1000         |
| random_state                          | 1-20                                            | 3            |
| max_leaf_nodes                        | 10-100                                          | 30           |
| min_samples_split                     | 2-20                                            | 10           |
| <b>Gradient Boosting</b>              |                                                 |              |
| learning_rate                         | 0.001-0.1                                       | 0.01         |
| loss                                  | deviance', 'exponential'                        | exponential' |
| max_depth                             | 3-20                                            | 9            |
| max_leaf_nodes                        | 5-50                                            | 5            |
| min_samples_leaf                      | 1-50                                            | 25           |
| min_samples_split                     | 2-20                                            | 5            |
| n_estimators                          | 100-5000                                        | 500          |
| subsample                             | 0.1-1                                           | 1            |
| <b>AdaBoosting</b>                    |                                                 |              |
| n_estimators                          | 100-5000                                        | 200          |
| learning_rate                         | 0.001-0.1                                       | 0.01         |
| <b>Logistic Regression</b>            |                                                 |              |
| max_iter                              | 0.001-1000                                      | 100          |
| nverse of regularization strength (C) | 0.001-200                                       | 100          |
| solver                                | liblinear', 'newton-cg', 'lbfgs', 'sag', 'saga' | liblinear'   |
| penalty                               | L1', 'L2'                                       | L2'          |

**Table S2. Range of hyperparameter optimization values.**

## Model building methods and code

The raw data processing was performed via the *Numpy* package, while dataset splitting and model construction were carried out via the *Sklearn* package in *Python 3.12.4*<sup>12</sup>. The study constructed a total of 8 independent models, and the specific methods and construction process of these models are as follows:

### 1. Logistic Regression

Logistic regression is a regression method widely used for modeling binary outcomes. It applies the logit function to the linear combination of independent variables to map the predicted results to the [0, 1] interval, estimating the probability of event occurrence<sup>13,14</sup>. Compared to traditional linear regression, logistic regression has significant advantages in dealing with non-continuous dependent variables (such as presence or absence of disease, survival or not). The method's statistical inference is based on maximum likelihood estimation, with a key focus on ensuring independence, avoiding multicollinearity, and maintaining a linear relationship for continuous variables on a log-odds scale<sup>15</sup>. In numerous clinical and epidemiological studies, logistic regression is widely used to investigate disease risk factors, predict clinical outcomes, and assess intervention effects.

**Code:**

```
lr = LogisticRegression(max_iter=100,C = 100,solver='liblinear',penalty='l2');
```

## **2. K-Nearest Neighbors**

The K-nearest neighbors (K-NN) algorithm has been widely recognized as a non-parametric classification and regression method based on instance learning since the 1990s<sup>16</sup>. The core idea is to calculate the distance between the sample to be classified and all samples in the training set, selecting the K nearest neighbors, and making predictions based on the neighbors' categories. The standard K-NN algorithm was first applied in academia, its main advantage being its simplicity in implementation, allowing for direct prediction using distance calculations without the need for a training phase<sup>16</sup>.

**Code:**

```
knn = KNeighborsClassifier(n_neighbors=24);
```

## **3. Support Vector Machine**

Support Vector Machine (SVM) is based on the principle of "structural risk minimization" in statistical learning theory, aiming to find a separating hyperplane with the maximum margin to effectively enhance the model's generalization ability<sup>17</sup>. In the basic linear SVM model, the algorithm transforms the training data into a high-dimensional space and determines the optimal hyperplane by solving a convex quadratic programming problem. Kernel function technique allows SVM to create non-linear decision boundaries for non-linearly separable problems<sup>18</sup>. Commonly used kernel functions include radial basis function (RBF), polynomial

kernel, and sigmoid kernel, among others. The choice of different kernel functions significantly impacts the performance of the model. In addition, SVM introduces slack variables during model training to handle noise and outliers in the data, allowing it to maintain high accuracy while preventing overfitting<sup>19</sup>.

**Code:**

```
svc = SVC(kernel='linear', max_iter=500, C=0.1, probability=True);
```

#### **4. Gaussian Naive Bayes**

The Gaussian Naive Bayes (GNB) classifier is based on Bayes' theorem, assuming all features are conditionally independent and continuous variables follow a Gaussian distribution. The essence of this approach is to compute the posterior probability and make classification decisions by maximizing the probability. In the field of disease prediction and classification, GNB is widely used for the early diagnosis of chronic diseases, cancer, and internal medicine conditions. In real medical data, it is often difficult to fully satisfy, which may affect the accuracy of the model's predictions. Therefore, scholars improve feature selection and data preprocessing techniques to minimize the impact of correlations, or use ensemble methods to integrate results from multiple classifiers<sup>20</sup>.

**Code:**

```
bays = GaussianNB(var_smoothing=0.01);
```

#### **5. Decision Tree**

Decision tree is a model with a tree-like structure, consisting of nodes that split data based on certain criteria until reaching a predetermined termination condition. The construction of a decision tree mainly involves two steps: attribute selection and tree pruning. During the attribute selection process, commonly used quantification metrics such as information gain, entropy, and Gini index are used to determine the optimal splitting attribute, thereby maximizing the inter-class differences at each branch<sup>21</sup>. To avoid overfitting during the construction process, pruning techniques are usually employed to simplify the complexity of the tree<sup>21</sup>.

**Code:**

```
tree = DecisionTreeClassifier( max_depth=3, min_samples_leaf=3, criterion='entropy',  
min_samples_split=5, splitter='best');
```

#### **6. Random Forest**

Random forest (RF), as a non-parametric, ensemble machine learning algorithm, has shown many significant advantages in medical data mining and risk prediction. Firstly, RF's random sampling and majority voting mechanism make it robust in handling noisy and high-dimensional data. Additionally, its built-in variable importance assessment provides clinicians with an intuitive feature selection tool, effectively reducing the feature space and revealing underlying biological mechanisms<sup>22</sup>. Recent research has successfully applied random forests to various fields such as neuroimaging, cardiovascular diseases, diabetes prediction, and monitoring of drug adverse reactions, demonstrating high practical value of RF in all these areas<sup>23,24</sup>.

**Code:**

```
rf = RandomForestClassifier(max_depth=6, max_features='sqrt', min_samples_leaf=2,  
n_estimators=700, random_state=7, max_leaf_nodes=30, min_samples_split=10);
```

## **7. Extreme Random Tree**

Extreme random tree classifier is a type of decision tree ensemble method, similar to RF, where the core idea is to vote on the predictions of multiple decision trees. However, ET achieves higher levels of randomness and generalization ability through the following key features:

- Random split points: During node splitting, ET does not select the data-driven optimal split point, but randomly selects from possible split values of features to further increase model diversity<sup>25</sup>.

- Ensemble decision: ET uses the predictions of multiple trees for majority voting or averaging to enhance model robustness and stability<sup>26</sup>.

Given these characteristics, ET has significant advantages in computational efficiency and model robustness compared to traditional decision trees and random forests. It also performs well in handling high-dimensional features and heterogeneous data, which is particularly important for the complexity of medical data <sup>27</sup>.

**Code:**

```
extraTreeclassifier = ExtraTreesClassifier(max_depth=10, max_features='sqrt',  
min_samples_leaf=2, n_estimators=1000, random_state=3, max_leaf_nodes=30,  
min_samples_split=10);
```

## **8. Gradient Boosting**

The gradient boosting algorithm works by creating a sequence of weak learners (often decision trees) and updating each model by using the residuals from the previous model as the new target, moving closer to the true value with each iteration. This approach offers powerful nonlinear fitting capabilities and robustness, making it well-suited for high-dimensional data and complex pattern recognition tasks<sup>28</sup>. GB methods typically involve the following steps: initializing the model, usually with a simple mean prediction. In each iteration, calculate the current model's residual and fit it with a new weak learner. Update the overall model based on the predictions of weak learners, and introduce a learning rate to prevent overfitting. Repeat this process until reaching a predetermined number of iterations or the error decreases to a certain level. To improve model performance, researchers often use techniques such as cross-validation and Bayesian optimization for hyperparameter tuning, while incorporating regularization techniques to mitigate the risk of overfitting complex models<sup>29</sup>. In addition, there are efficient implementations like XGBoost, LightGBM, which have significantly optimized computing speed and memory usage, making them advantageous in large-scale medical data processing<sup>30</sup>.

#### **Code:**

```
gb = GradientBoostingClassifier(learning_rate = 0.01, loss ='exponential', max_depth = 9,  
max_leaf_nodes = 5, min_samples_leaf = 25, min_samples_split = 5, n_estimators = 500,  
subsample= 1);
```

### **9. WPV**

The basic principle of WPV integration method lies in the fact that different models may exhibit complementary performance advantages when facing complex tasks. By using the predicted probabilities of each model and assigning different weights based on their accuracy on the validation set, we can mitigate the negative impact of individual model errors on overall predictions. In addition, when designing the WPV model, it is necessary to consider not only the synergistic effects between different models, but also to effectively address the potential issues of data redundancy and high dimensionality that may exist between models. The voting ensemble learning method can produce results using either hard or soft voting. Hard voting is ideal for predicting distinct class labels, whereas soft voting is more suitable for predicting continuous values. This study focused on tweets categorized into different groups, suggesting that hard voting

is preferable over soft voting<sup>31</sup>.

**Code:**

```
WPV_model = VotingClassifier(estimators=[('rf', rf), ('bays', bays), ('knn', knn)],  
voting='soft', weights=[1, 1, 1], verbose=1)
```

**Supplementary Results**

| Ran<br>k | Model                           | Accuracy<br>(%) | AUC  | Sensitivity<br>(%) | Specificity<br>(%) | Youden<br>index<br>(%) | PPV<br>(%) | NPV<br>(%) | Thre<br>shold |
|----------|---------------------------------|-----------------|------|--------------------|--------------------|------------------------|------------|------------|---------------|
| 1        | WPV                             | 85.15           | 0.87 | 81.08              | 87.50              | 68.58                  | 78.9<br>5  | 88.89      | NA            |
| 2        | Extra<br>Tree<br>Classifie<br>r | 83.17           | 0.87 | 70.27              | 90.63              | 60.90                  | 81.2<br>5  | 84.06      | 0.51          |
| 3        | Random<br>Forest                | 84.15           | 0.85 | 72.97              | 90.62              | 63.60                  | 81.8<br>2  | 85.29      | 0.50          |
| 4        | K-Neare<br>st<br>Neighbo<br>ur  | 82.18           | 0.85 | 70.27              | 89.06              | 59.33                  | 78.7<br>9  | 83.82      | 0.58          |
| 5        | Gradient<br>Boosting            | 81.19           | 0.85 | 72.97              | 85.93              | 58.91                  | 75.0<br>0  | 84.61      | 0.53          |
| 6        | Support<br>Vector<br>Machine    | 79.21           | 0.83 | 75.67              | 81.25              | 56.93                  | 70.0<br>0  | 85.24      | 0.43          |
| 7        | Decision<br>Tree                | 79.21           | 0.82 | 75.68              | 81.25              | 56.92                  | 70.0<br>0  | 85.24      | 0.27          |
| 8        | Logistic<br>Regressi<br>on      | 77.23           | 0.84 | 75.67              | 78.13              | 53.80                  | 66.6<br>7  | 84.75      | 0.60          |
| 9        | Gaussian<br>Naive<br>Bayes      | 73.28           | 0.88 | 86.49              | 65.63              | 52.11                  | 59.2<br>6  | 89.36      | 0.79          |

**Table S3. Summary of the performance of all models.**

Confusion matrix for all models

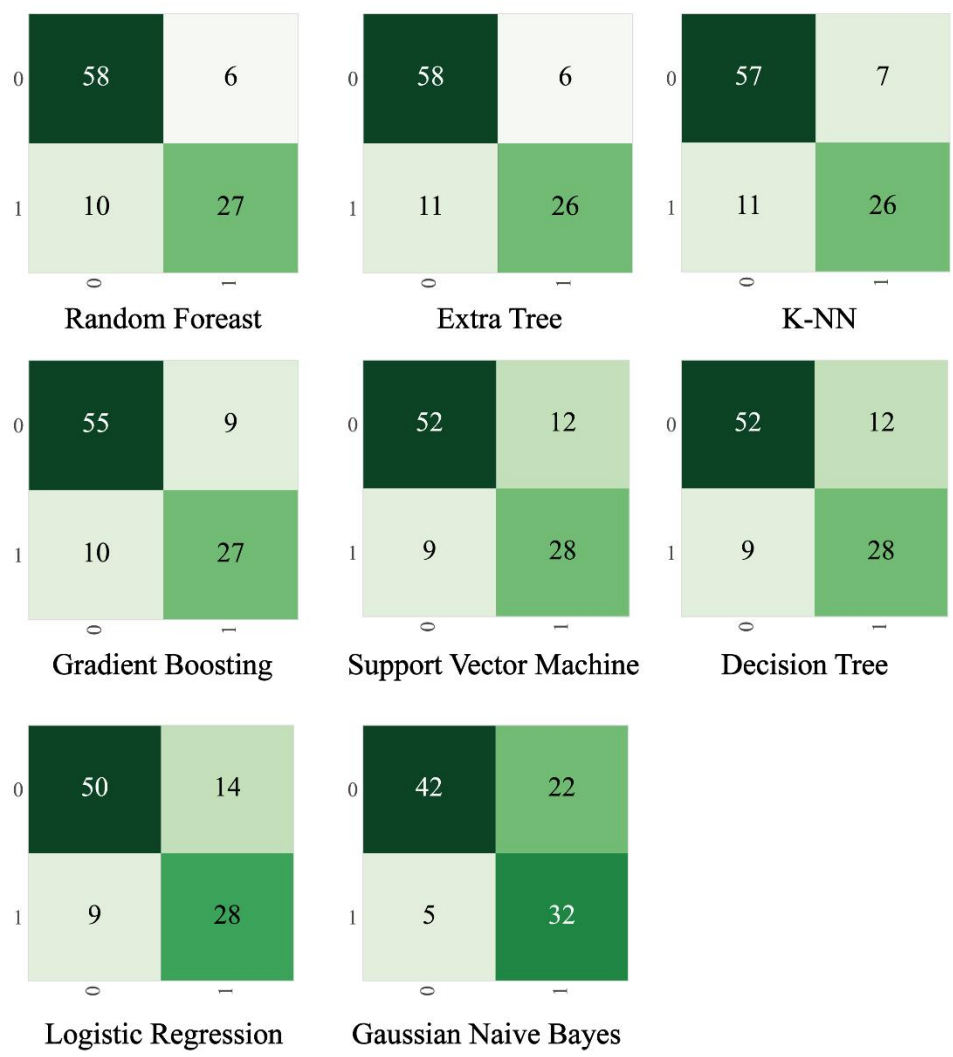

Figure S1. Confusion matrices of all models. K-Nearest Neighbors (K-NN).

## ROCAUC for all models

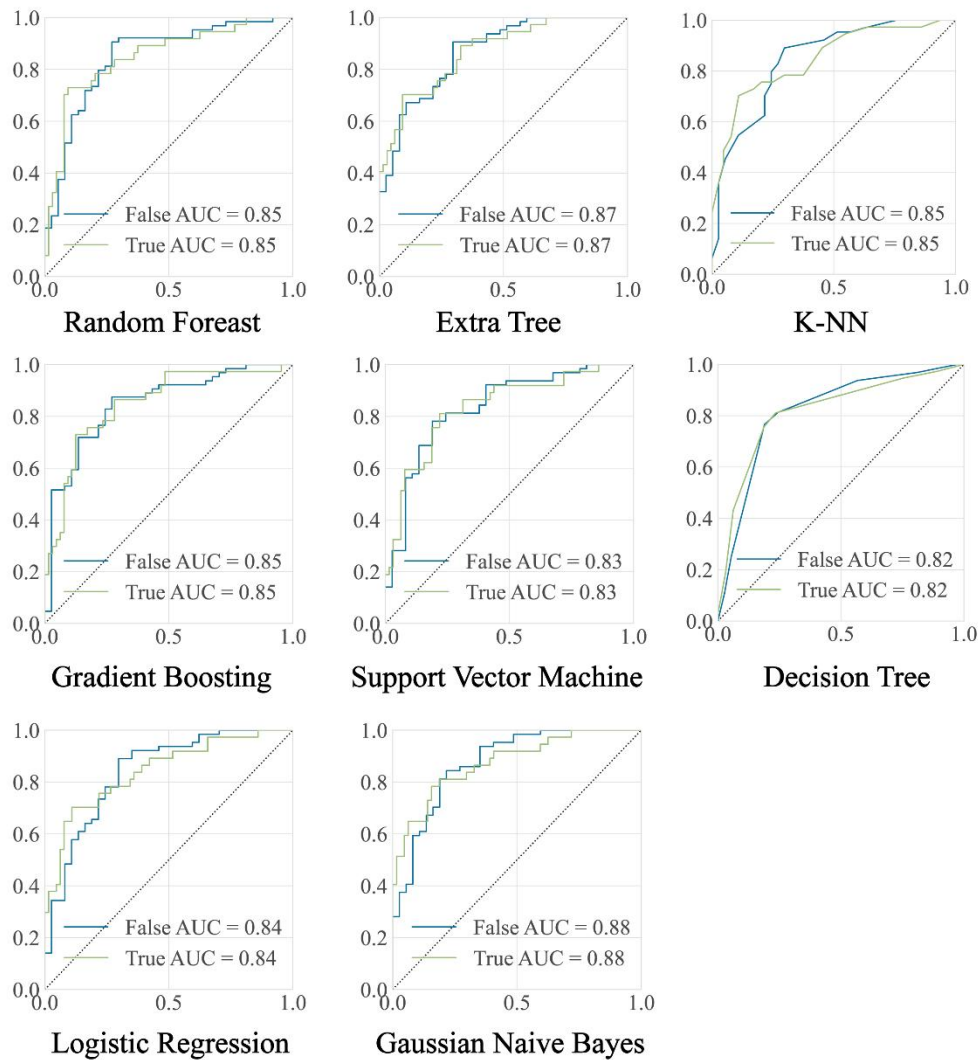

**Figure S2. AUC curves of all models.** Area under receiver operating characteristic curve (AUC), K-Nearest Neighbors (K-NN).

## Learning Curve for all models

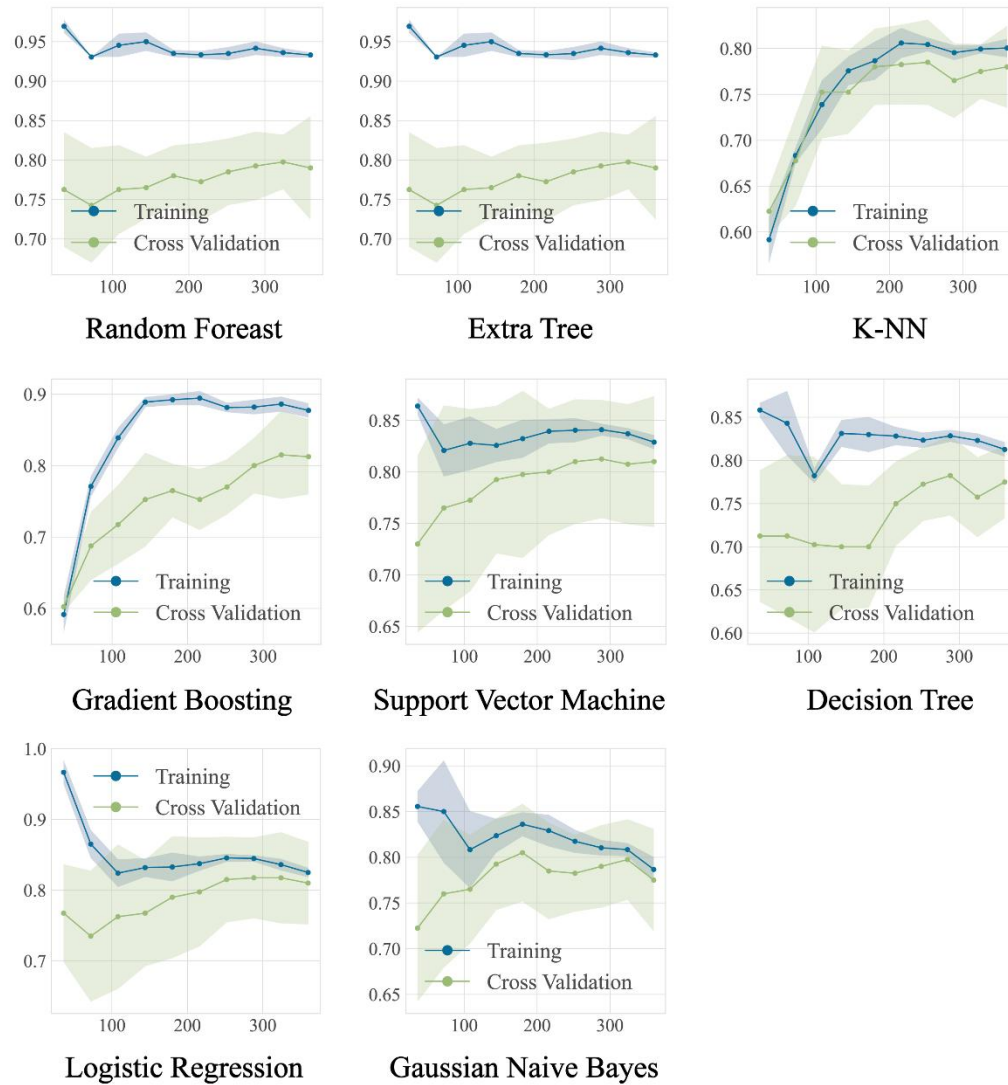

**Figure S3. Learning curves of all models. K-Nearest Neighbors (K-NN).**

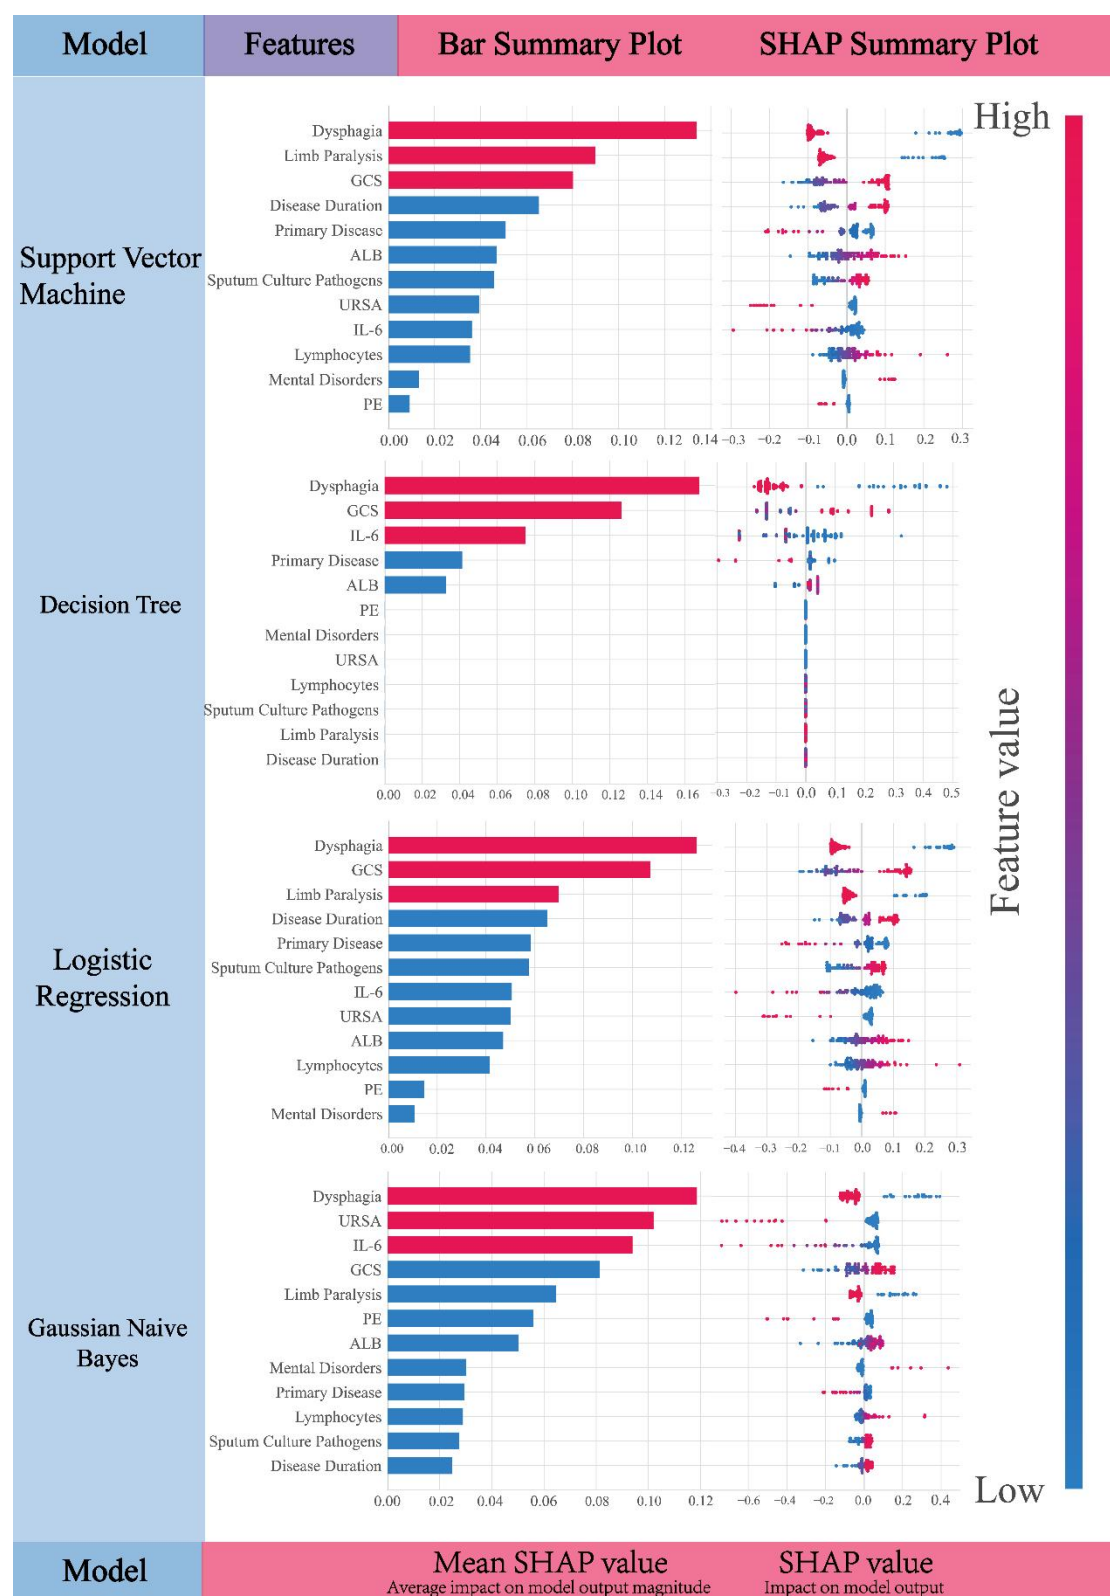

Figure S4. Bar summary plots and SHAP summary plots for the remaining four models. Shapley additive explanations (SHAP), Glasgow Coma Scale (GCS), Upper Respiratory Tract Structural Abnormalities (URSA), Interleukin 6 (IL-6), Albumin (ALB), Pulmonary Embolism (PE), K-Nearest Neighbors (K-NN).

- 215 1 Bandopadhyay, R. *et al.* Recent Developments in Diagnosis of Epilepsy: Scope of  
216 MicroRNA and Technological Advancements. *Biology* **10**, doi:10.3390/biology10111097  
217 (2021).
- 218 2 Malta, D. C. *et al.* Prevalence of arterial hypertension according to different diagnostic  
219 criteria, National Health Survey. *Revista brasileira de epidemiologia = Brazilian journal of*  
220 *epidemiology* **21**, e180021, doi:10.1590/1980-549720180021.supl.1 (2018).
- 221 3 Alberti, K. G. & Zimmet, P. Z. Definition, diagnosis and classification of diabetes mellitus  
222 and its complications. Part 1: diagnosis and classification of diabetes mellitus provisional  
223 report of a WHO consultation. *Diabetic medicine : a journal of the British Diabetic*  
224 *Association* **15**, 539-553,  
225 doi:10.1002/(sici)1096-9136(199807)15:7<539::Aid-dia668>3.0.Co;2-s (1998).
- 226 4 Knuuti, J. *et al.* 2019 ESC Guidelines for the diagnosis and management of chronic  
227 coronary syndromes. *European heart journal* **41**, 407-477, doi:10.1093/eurheartj/ehz425  
228 (2020).
- 229 5 李积凤 & 杨媛华. 《肺血栓栓塞症诊治与预防指南》——关于静脉血栓栓塞症预防的  
230 推荐意见 %J 中国医刊. **53**, 1078-1082 (2018).
- 231 6 高二击, 李扬, 郭翔 & 杨异. 肺挫伤的诊断与治疗进展 %J 中华胸部外科电子杂志. **6**,  
232 28-32 (2019).
- 233 7 于翠香 & 王西艳. 《中国成人医院获得性肺炎与呼吸机相关性肺炎诊断和治疗指南  
234 (2018 年版)》解读 %J 中国医刊. **56**, 951-953 (2021).
- 235 8 Waterhouse, C. Practical aspects of performing Glasgow Coma Scale observations.  
236 *Nursing standard (Royal College of Nursing (Great Britain) : 1987)* **31**, 40-46,  
237 doi:10.7748/ns.2017.e10189 (2017).
- 238 9 Dziewas, R. *et al.* European Stroke Organisation and European Society for Swallowing  
239 Disorders guideline for the diagnosis and treatment of post-stroke dysphagia. *European*  
240 *stroke journal* **6**, Lxxxix-cxv, doi:10.1177/23969873211039721 (2021).
- 241 10 Hao, P. Y., Chiang, J. H. & Chen, Y. D. Possibilistic classification by support vector  
242 networks. *Neural networks : the official journal of the International Neural Network*  
243 *Society* **149**, 40-56, doi:10.1016/j.neunet.2022.02.007 (2022).
- 244 11 Becker, T., Rousseau, A. J., Geubbelmans, M., Burzykowski, T. & Valkenborg, D. Decision  
245 trees and random forests. *American journal of orthodontics and dentofacial orthopedics : official publication of the American Association of Orthodontists, its constituent societies, and the American Board of Orthodontics* **164**, 894-897, doi:10.1016/j.ajodo.2023.09.011  
246 (2023).
- 247 12 Abraham, A. *et al.* Machine learning for neuroimaging with scikit-learn. *Frontiers in*  
248 *neuroinformatics* **8**, 14, doi:10.3389/fninf.2014.00014 (2014).
- 249 13 Stoltzfus, J. C. Logistic regression: a brief primer. *Academic emergency medicine : official*  
250 *journal of the Society for Academic Emergency Medicine* **18**, 1099-1104,  
251 doi:10.1111/j.1553-2712.2011.01185.x (2011).
- 252 14 Besag, J., Green, P., Higdon, D. & Mengersen, K. Bayesian Computation and Stochastic  
253 Systems. **10** %J *Statistical Science*, 3-41, 39 (1995).
- 254 15 The Risk of Determining Risk with Multivariable Models. **118**, 201-210,  
255 doi:10.7326/0003-4819-118-3-199302010-00009 %m 8417638 (1993).

- 258 16 Xu, L., Krzyzak, A. & Suen, C. Y. Methods of combining multiple classifiers and their  
259 applications to handwriting recognition. *IEEE Transactions on Systems, Man, and*  
260 *Cybernetics* **22**, 418-435, doi:10.1109/21.155943 (1992).
- 261 17 El-Naqa, I., Yongyi, Y., Wernick, M. N., Galatsanos, N. P. & Nishikawa, R. M. A support  
262 vector machine approach for detection of microcalcifications. *IEEE Transactions on*  
263 *Medical Imaging* **21**, 1552-1563, doi:10.1109/TMI.2002.806569 (2002).
- 264 18 Jin, Z., Hei, T. G. & Jin, K. *Application of support vector machines for categorizing*  
265 *biological and medical data*. Vol. 13105 CGAIDP (SPIE, 2024).
- 266 19 Jui, S. J. J. *et al.* Application of Entropy for Automated Detection of Neurological  
267 Disorders With Electroencephalogram Signals: A Review of the Last Decade (2012–2022).  
268 *IEEE Access* **11**, 71905–71924, doi:10.1109/ACCESS.2023.3294473 (2023).
- 269 20 Amiri, Z., Heidari, A., Navimipour, N. J., Esmailpour, M. & Yazdani, Y. The deep learning  
270 applications in IoT-based bio- and medical informatics: a systematic literature review.  
271 *Neural Computing and Applications* **36**, 5757–5797, doi:10.1007/s00521-023-09366-3  
272 (2024).
- 273 21 Jin, H. & Ling, C. X. Using AUC and accuracy in evaluating learning algorithms. *IEEE*  
274 *Transactions on Knowledge and Data Engineering* **17**, 299–310,  
275 doi:10.1109/TKDE.2005.50 (2005).
- 276 22 Khalilia, M., Chakraborty, S. & Popescu, M. Predicting disease risks from highly  
277 imbalanced data using random forest. *BMC Medical Informatics and Decision Making* **11**,  
278 51, doi:10.1186/1472-6947-11-51 (2011).
- 279 23 Ebrahim, O. A. & Derbew, G. Application of supervised machine learning algorithms for  
280 classification and prediction of type-2 diabetes disease status in Afar regional state,  
281 Northeastern Ethiopia 2021. *Scientific reports* **13**, 7779,  
282 doi:10.1038/s41598-023-34906-1 (2023).
- 283 24 Bhatt, C. M., Patel, P., Ghetia, T. & Mazzeo, P. L. Effective Heart Disease Prediction Using  
284 Machine Learning Techniques. **16**, 88 (2023).
- 285 25 Jiang, H. *et al.* Mobile Application and Machine Learning-Driven Scheme for Intelligent  
286 Diabetes Progression Analysis and Management Using Multiple Risk Factors. **11**, 1053  
287 (2024).
- 288 26 Izonin, I., Tkachenko, R., Shakhovska, N., Ilchyshyn, B. & Singh, K. K. A Two-Step Data  
289 Normalization Approach for Improving Classification Accuracy in the Medical Diagnosis  
290 Domain. **10**, 1942 (2022).
- 291 27 Reshi, A. A. *et al.* Diagnosis of vertebral column pathologies using concatenated  
292 resampling with machine learning algorithms. *PeerJ. Computer science* **7**, e547,  
293 doi:10.7717/peerj-cs.547 (2021).
- 294 28 Natekin, A. & Knoll, A. Gradient boosting machines, a tutorial. **7**,  
295 doi:10.3389/fnbot.2013.00021 (2013).
- 296 29 Bentéjac, C., Csörgő, A. & Martínez-Muñoz, G. A comparative analysis of gradient  
297 boosting algorithms. *Artificial Intelligence Review* **54**, 1937–1967,  
298 doi:10.1007/s10462-020-09896-5 (2021).
- 299 30 Rufo, D. D., Debelee, T. G., Ibenthal, A. & Negera, W. G. Diagnosis of Diabetes Mellitus  
300 Using Gradient Boosting Machine (LightGBM). **11**, 1714 (2021).
- 301 31 Mutanga, R. T., Naicker, N., Olugbara, O. O. J. I. J. o. A. C. S. & Applications. Detecting

302           Hate Speech on Twitter Network using Ensemble Machine Learning. (2022).  
303
